# Supplementary material for: Indoor light harvesting lead-free 2-aminothiazolium bismuth iodide solar cells
Source: Royal Society of Chemistry journal article supplement (doi:10.1039/d1se02017j), 2022-01-01
Supplement: d1se02017j1.pdf [file d1se02017j1.pdf]

## Supporting Information

### Indoor light harvesting lead-free 2-aminothiazolium bismuth iodide solar cells

V. Arivazhagan<sup>a</sup>, Fraser Gun<sup>a</sup>, R. Kiran Kumar Reddy<sup>a</sup>, Tianyue Li<sup>b</sup>, Milan Adelt<sup>c</sup>, Neil Robertson<sup>b</sup>, Yu Chen<sup>c</sup> and Aruna Ivaturi\*<sup>a</sup>

<sup>a</sup>Smart Materials Research and Device Technology (SMaRDT) Group, Department of Pure and Applied Chemistry, University of Strathclyde, Thomas Graham Building, Glasgow, G1 1XL, United Kingdom

<sup>b</sup>EastCHEM, School of Chemistry, University of Edinburgh, King's Buildings, Edinburgh, EH9 3FJ, United Kingdom

<sup>c</sup>Department of Physics, University of Strathclyde, Glasgow, G4 0RE, United Kingdom

\*Corresponding author: [aruna.ivaturi@strath.ac.uk](mailto:aruna.ivaturi@strath.ac.uk)

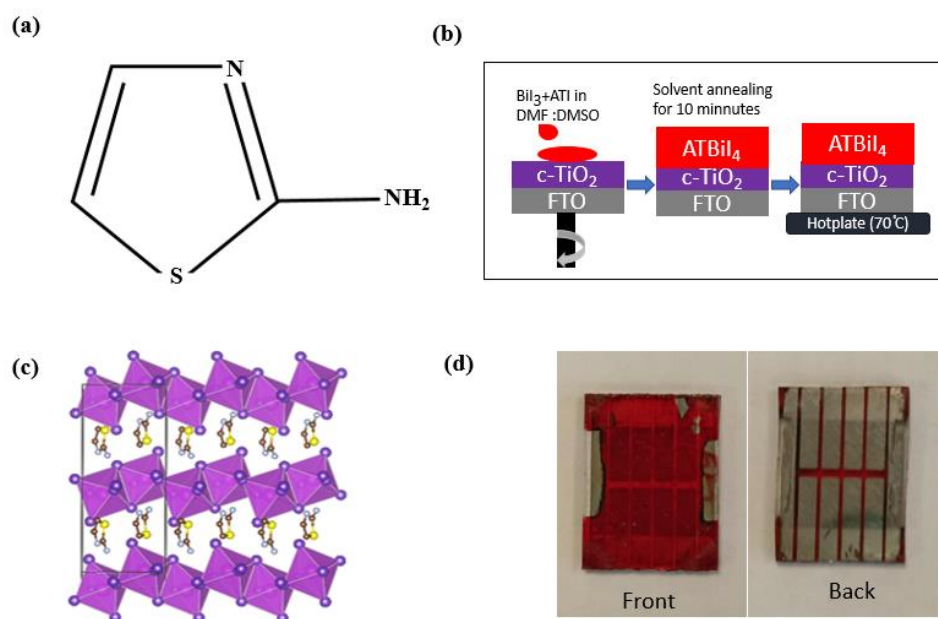

**Fig. S1.** a) Chemical structure of ATI ligand, b) schematic of the film growth c) crystal structure of ATBi<sub>4</sub> [1] and d) photographs of a fabricated solar cell.

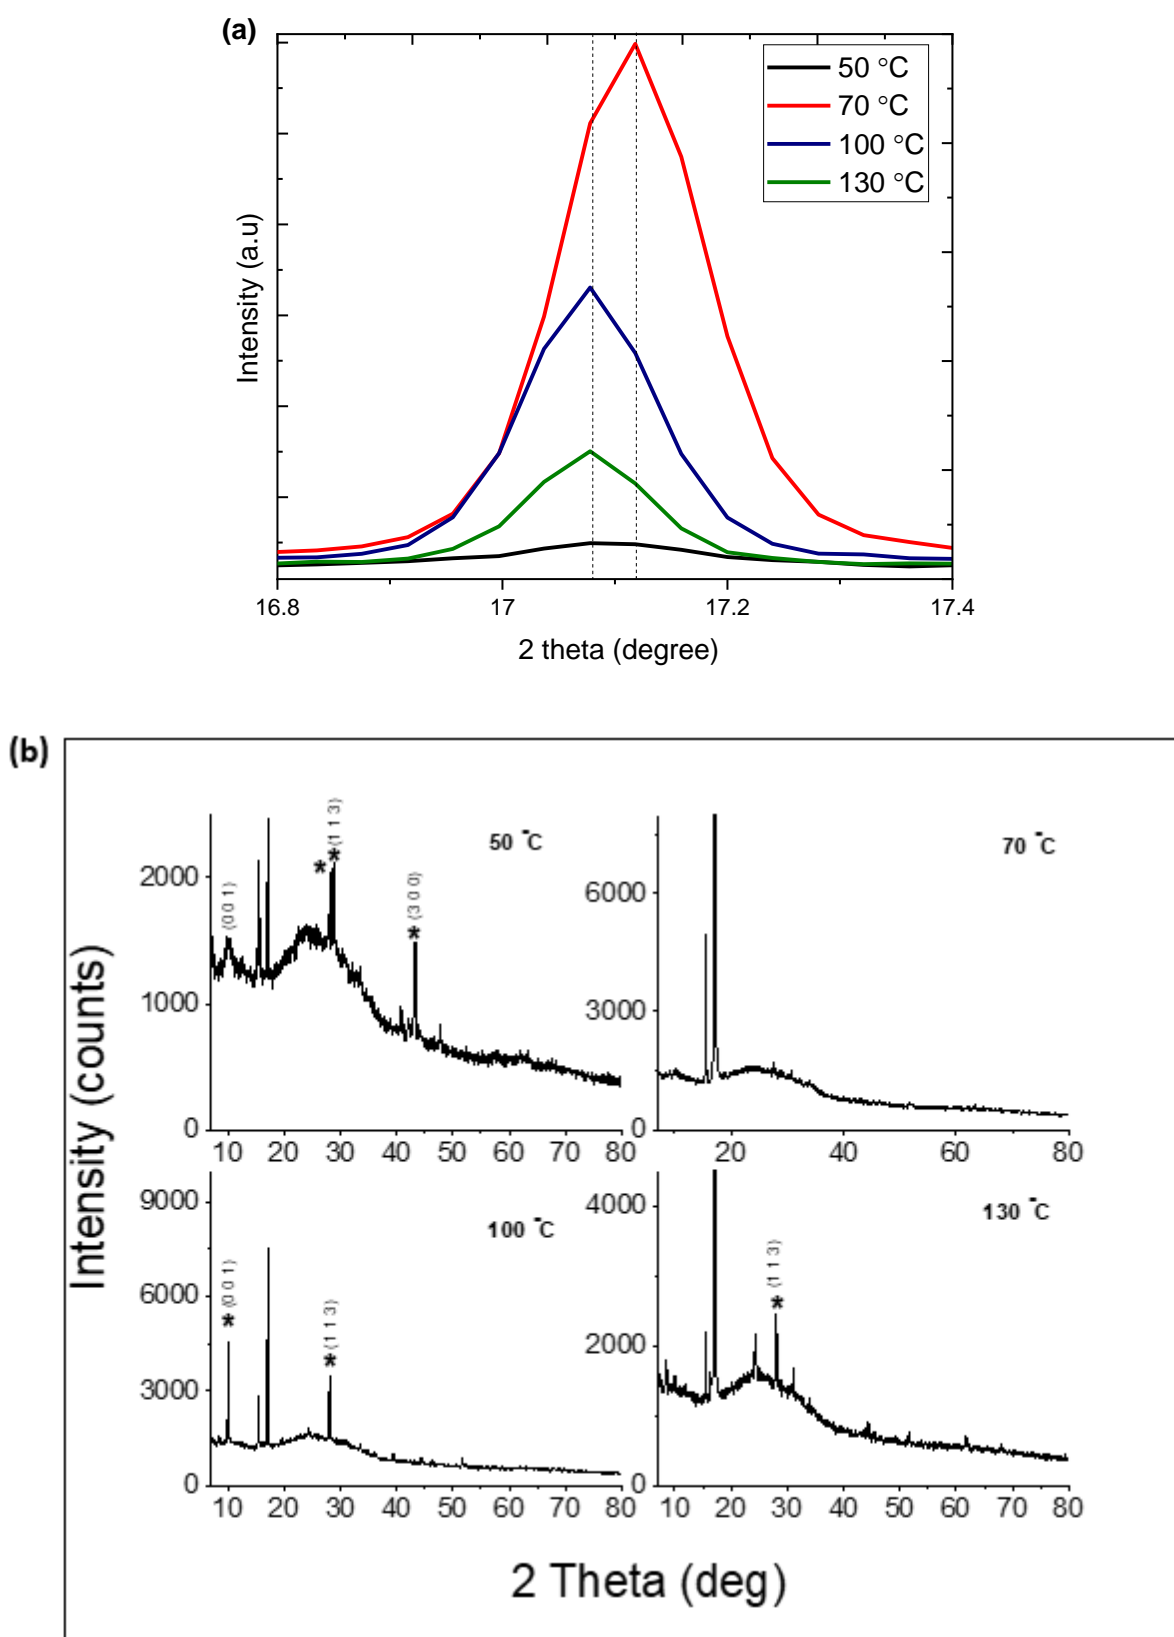

**Fig. S2.** (a) Enlarged view of the (112) XRD peak and (b) Normalized XRD patterns of the ATBi<sub>4</sub> films annealed at different temperatures with BiI<sub>3</sub> peaks indexed.

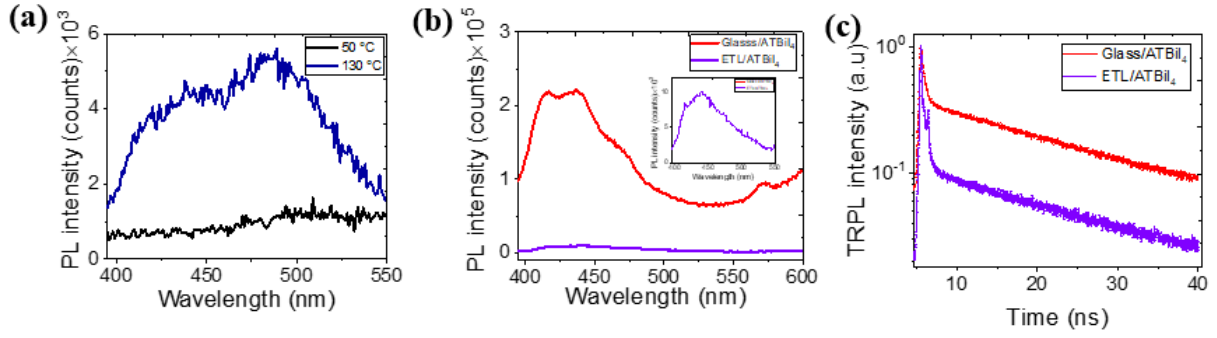

**Fig. S3.** (a) PL spectra of 50 °C and 130 °C annealed films, (b) PL spectra of optimal 70 °C annealed ATBiI<sub>4</sub> films on glass and ETL substrates, and (c) TRPL spectra of the optimal ATBiI<sub>4</sub> films on glass and ETL substrates.

**Table S1:** TRPL decay life time of different temperature annealed ATBiI<sub>4</sub> films on glass.

| Films  | $\tau_1$<br>(ns) | $\tau_2$<br>(ns) | $\tau_3$<br>(ns) | A <sub>1</sub> | A <sub>2</sub> | A <sub>3</sub> | $\tau_{avg}$<br>(ns) | Chi.sq   |
|--------|------------------|------------------|------------------|----------------|----------------|----------------|----------------------|----------|
| 50 °C  | 0.12             | 0.12             | 1.31             | 120066.27      | 72023.00       | 539.93         | 0.05                 | 269.00   |
| 70 °C  | 0.45             | 32.07            | -                | 13138.33       | 4175.96        | -              | 8.07                 | 19234    |
| 100 °C | 0.43             | 30.59            | -                | 22006.77       | 3597.85        | -              | 4.66                 | 14702    |
| 130 °C | 0.29             | 17.88            | -                | 31748.38       | 2048.15        | -              | 1.35                 | 12688.02 |

\*Average decay time is calculated according to the equation:  $\tau = (A_1\tau_1 + A_2\tau_2)/(A_1 + A_2)$ .

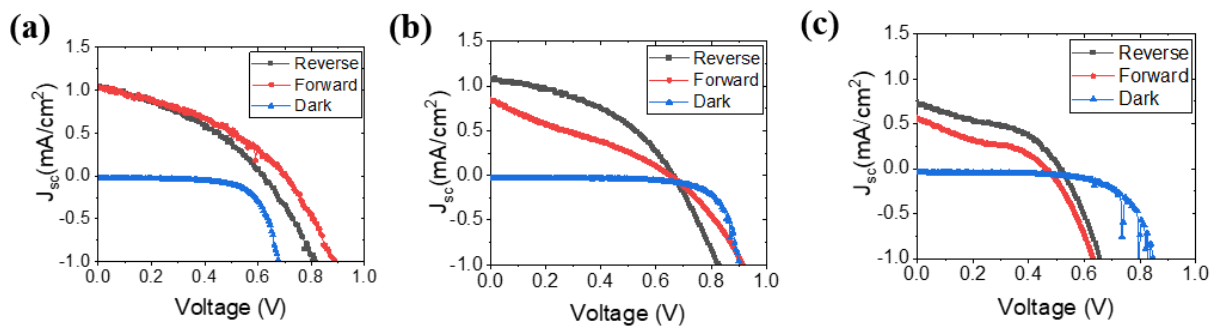

**Fig. S4:** Reverse and forward scan J-V plot of solar cells based on a) 50 °C, b) 100 °C and c) 130 °C annealed ATBiI<sub>4</sub> films.

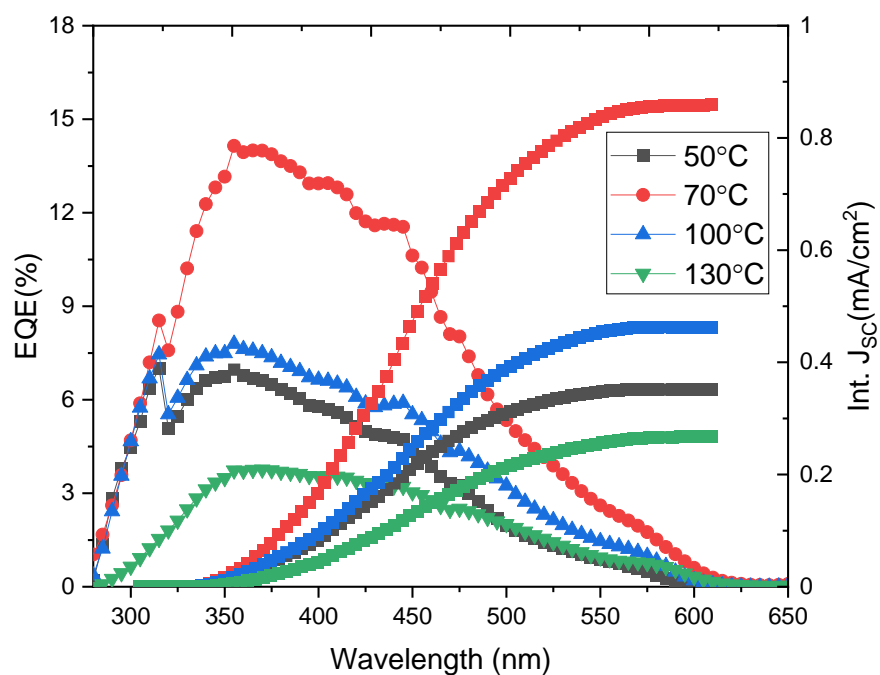

**Fig. S5:** EQE and integrated  $J_{sc}$  spectra of solar cells with ATBiI<sub>4</sub> films annealed at 50 °C, 100 °C and 130 °C.

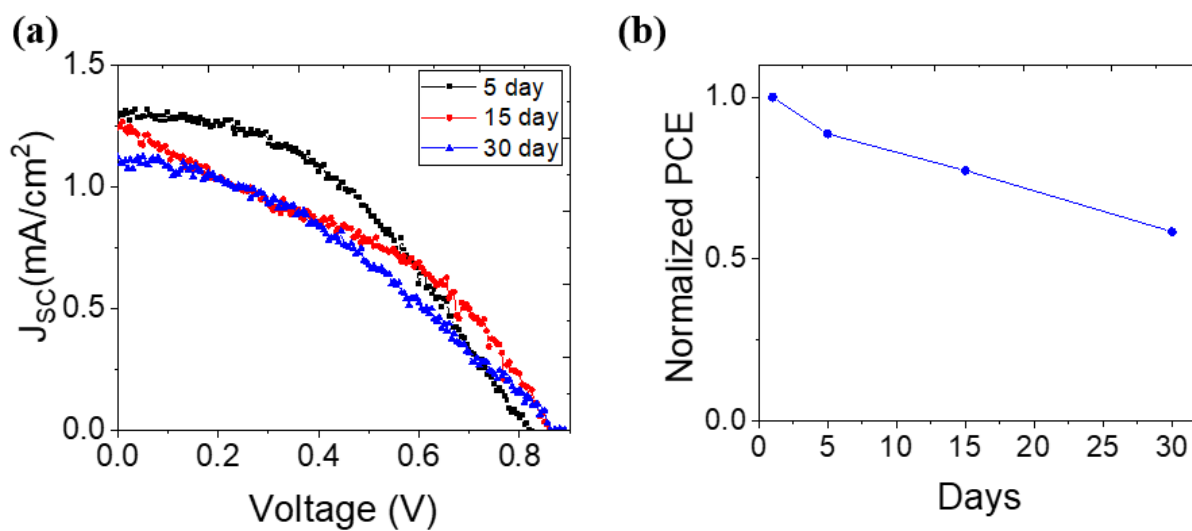

**Fig. S6:** Aging test of a solar cell with 70°C annealed ATBiI<sub>4</sub> film stored in ambient conditions (Relative humidity: 35-45 %, Temperature: 17-22 °C). (a) J-V plot of the device tested on varied days and (b) normalized PCE as a function time (in days).

**Table S2:** Trap densities ( $n_t$ ) estimated from the ETL and HTL only devices.

| Films annealing temperature | $n_t$ ( $\times 10^{18} \text{ cm}^{-3}$ ) (ETL only device) | $n_t$ ( $\times 10^{18} \text{ cm}^{-3}$ ) (HTL only device) |
|-----------------------------|--------------------------------------------------------------|--------------------------------------------------------------|
| 50 °C                       | -                                                            | 8.93                                                         |
| 70 °C                       | 2.5                                                          | 3.99                                                         |
| 100 °C                      | 3.7                                                          | 6.58                                                         |
| 130 °C                      | -                                                            | 23.5                                                         |

**Table S3:** EIS fitting parameters of ATBiI<sub>4</sub> solar cells

| Films annealing temperature | $R_s$ ( $\Omega$ ) | $R_{ct}$ (k $\Omega$ ) |
|-----------------------------|--------------------|------------------------|
| 50 °C                       | 13.83              | 31.08                  |
| 70 °C                       | 3.18               | 2.42                   |
| 100 °C                      | 33.03              | 15.06                  |
| 130 °C                      | 37.60              | 40.51                  |

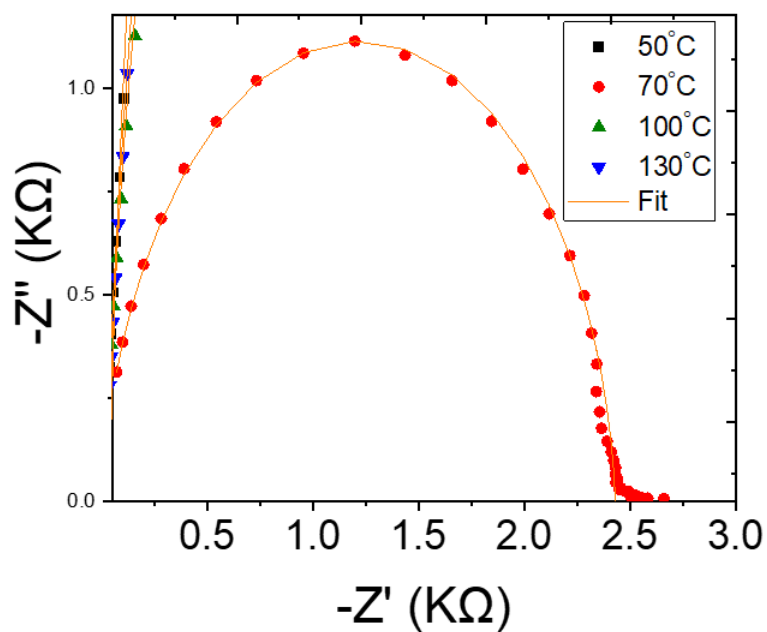

**Fig. S7.** Magnified view of the Nyquist plot of 70 °C annealed ATBiI<sub>4</sub> based device with the corresponding fit.

## References

1. Li, T., et al., *Extending lead-free hybrid photovoltaic materials to new structures: thiazolium, aminothiazolium and imidazolium iodobismuthates*. Dalton Transactions, 2018. **47**(20): p. 7050-7058.
